# Supplementary material
Source: Springer Nature journal article supplement (https://www.springermedizin.de/resource/supplementary/13014_2013_1262_MOESM3_ESM.pdf/9634518)

# (A) MCF-10A

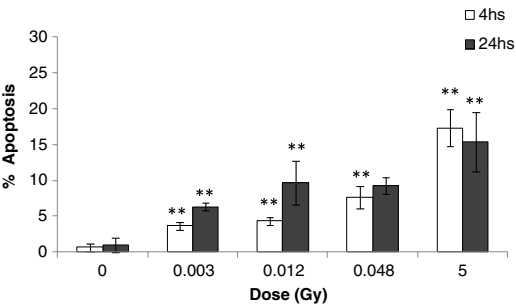

# (B) MCF-7

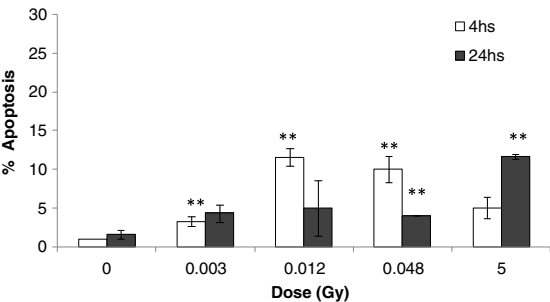

(C)

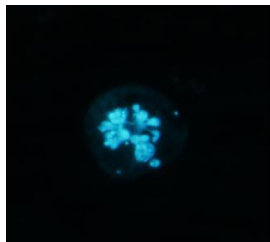

Supplement: MOESM3 [file 9634518]
